# Supplementary material
Source: PubMed Central journal article supplement (PMC10562984)
Supplement: jamapediatr-e233664-s002.pdf [file jamapediatr-e233664-s002.pdf]

## Data Sharing Statement

Flannery. Antibiotic Use Among Infants Admitted to Neonatal Intensive Care Units. *JAMA Pediatr*. Published October 09, 2023. doi:10.1001/jamapediatrics.2023.3664

### Data

**Data available:** No

### Additional Information

**Explanation for why data not available:** Data are available upon reasonable request to the corresponding author and with permission from Premier Health.
